# Supplementary material
Source: HighWire-hosted journal article supplement (https://erj.ersjournals.com/content/55/6/2000894)
Supplement: inline-supplementary-material-1 [file inline-supplementary-material-1.pdf]

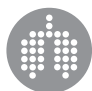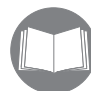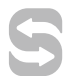

SHAREABLE PDF

# Progressive fibrosing interstitial lung disease: we know it behaves badly, but what does that mean?

Amornpun Wongkarnjana<sup>1</sup> and Christopher J. Ryerson<sup>2</sup>

**Affiliations:** <sup>1</sup>Firestone Institute for Respiratory Health, Research Institute at St Joseph's Healthcare, Dept of Medicine, McMaster University, Hamilton, ON, Canada. <sup>2</sup>Dept of Medicine, University of British Columbia and Centre for Heart Lung Innovation, St Paul's Hospital, Vancouver, BC, Canada.

**Correspondence:** Christopher J. Ryerson, St. Paul's Hospital, Respiratory Division, Rm.8446-8B, 1081 Burrard Street, Vancouver, BC V6Z 1Y6, Canada. E-mail: [chris.ryerson@hli.ubc.ca](mailto:chris.ryerson@hli.ubc.ca)

 @ERSpublications

**The criteria used to define progressive fibrosing interstitial lung disease identify a rapidly progressive phenotype that behaves like idiopathic pulmonary fibrosis, regardless of the underlying diagnosis** <https://bit.ly/3bW5DIV>

**Cite this article as:** Wongkarnjana A, Ryerson CJ. Progressive fibrosing interstitial lung disease: we know it behaves badly, but what does that mean? *Eur Respir J* 2020; 55: 2000894 [<https://doi.org/10.1183/13993003.00894-2020>].

This single-page version can be shared freely online.

The concept behind the INBUILD clinical trial was simple: if nintedanib slows progression of idiopathic pulmonary fibrosis (IPF) [1], then it might also slow progression in other forms of fibrotic interstitial lung disease (ILD) [2]. This was recently shown to be the case [3], with nintedanib slowing the rate of ILD progression in a diverse cohort of patients without IPF who met specific criteria for recent worsening. This study was a major advance, identifying a new treatment for a group of patients who previously had limited options.
